# Supplementary material
Source: PubMed Central journal article supplement (PMC1074689)
Supplement: pnas_102_14_5239__1.pdf [file pnas_102_14_5239__1.pdf]

## Supporting Text

### Evolution of the Average Synaptic Update Rule

In this appendix, we evaluate the derivative of Eq. 9 in the main text, i.e., we need to calculate

$$\frac{\partial}{\partial w_j} \left\langle \log \frac{P(y^k | Y^{k-1}, X^k)}{P(y^k | Y^{k-1})} - \gamma \log \frac{P(y^k | Y^{k-1})}{\tilde{P}(y^k | Y^{k-1})} \right\rangle_{Y^k, X^k}. \quad [1]$$

Before we start, let us recall some notation. The average of an arbitrary function  $f_w$  with arguments  $x$  and  $y$  is by definition

$$\langle f_w(x, y) \rangle_{x,y} = \sum_x \sum_y p_w(x, y) f_w(x, y) \quad [2]$$

where  $p_w(x, y)$  denotes the joint probability of the pair  $(x, y)$  to occur and the sum runs over all configurations of  $x$  and  $y$ . The subscript  $w$  indicates that both the probability distribution  $p_w$  and the function  $f_w$  may depend on a parameter  $w$ .

By definition, we have  $p_w(x, y) = p_w(y|x)p(x)$  where  $p(x)$  is a given input distribution and  $p_w(y|x)$  the (parameter-dependent) conditional probability of generating an output  $y$  given  $x$ . Hence, Eq. 2 can be transformed into

$$\langle f_w(x, y) \rangle_{x,y} = \sum_x p(x) \sum_y p_w(y|x) f_w(x, y) = \left\langle \sum_y p_w(y|x) f_w(x, y) \right\rangle_x \quad [3]$$

If we now take the derivative with respect to the parameter  $w$ , the product rule yields two terms

$$\begin{aligned} \frac{\partial}{\partial w} \langle f_w(x, y) \rangle_{x,y} &= \left\langle \sum_y p_w(y|x) \frac{\partial}{\partial w} f_w(x, y) \right\rangle_x \\ &+ \left\langle \sum_y p_w(y|x) \left[ \frac{\partial}{\partial w} \log p_w(y|x) \right] f_w(x, y) \right\rangle_x \end{aligned} \quad [4]$$

The first term contains the derivative of the function  $f_w$ , whereas the second term contains the derivative of the conditional probability  $p_w$ . We note that Eq. 4 can also be written in the form

$$\frac{\partial}{\partial w} \langle f_w(x, y) \rangle_{x,y} = \left\langle \frac{\partial}{\partial w} f_w(x, y) \right\rangle_{x,y} + \left\langle \left[ \frac{\partial}{\partial w} \log p_w(y|x) \right] f_w(x, y) \right\rangle_{x,y}, \quad [5]$$

i.e., as an average over the joint distribution of  $x$  and  $y$ . This formulation will be useful for the problem at hand.

The gradient in Eq. 1 contains several terms and for the moment we pick only one of these. The others will then be treated analogously. Let us focus on the term  $\left\langle \log P(y^k | Y^{k-1}, X^k) \right\rangle_{Y^k, X^k}$  and apply steps completely analogous to those

leading from Eqs. 2-5.

$$\begin{aligned}
& \frac{\partial}{\partial w_j} \left\langle \log P(y^k | Y^{k-1}, X^k) \right\rangle_{Y^k, X^k} \\
&= \left\langle \frac{\partial}{\partial w_j} \log P(y^k | Y^{k-1}, X^k) \right\rangle_{Y^k, X^k} \\
&+ \left\langle \left[ \frac{\partial}{\partial w_j} \log P(Y^k | X^k) \right] \log P(y^k | Y^{k-1}, X^k) \right\rangle_{Y^k, X^k}
\end{aligned} \tag{6}$$

We now evaluate the averages using the identity

$\langle \cdot \rangle_{Y^k, X^k} = \langle \langle \cdot \rangle_{y^k | Y^{k-1}, X^k} \rangle_{Y^{k-1}, X^k}$ . We find that the first term on the right-hand side of Eq. 6 vanishes, since

$$\begin{aligned}
& \left\langle \frac{\partial}{\partial w_j} \log P(y^k | Y^{k-1}, X^k) \right\rangle_{y^k | Y^{k-1}, X^k} \\
&= \sum_{y^k \in \{0,1\}} \frac{\partial}{\partial w_j} \left[ \log P(y^k | Y^{k-1}, X^k) \right] P(y^k | Y^{k-1}, X^k) \\
&= \frac{\partial}{\partial w_j} \left[ \sum_{y^k \in \{0,1\}} P(y^k | Y^{k-1}, X^k) \right] = 0
\end{aligned} \tag{7}$$

because of the normalization of probabilities. The same argument can be repeated to show that  $0 = \left\langle \frac{\partial}{\partial w_j} \log P(y^k | Y^{k-1}) \right\rangle_{y^k | Y^{k-1}, X^k}$ . The reference

distribution  $\tilde{P}(y^k | Y^{k-1})$  is by definition independent of  $w_j$ .

Hence, the only term that gives a nontrivial contribution on the right-hand side of Eq. 6 is the second term. With an analogous argument for the other factors in Eq. 1, we have

$$\begin{aligned}
& \frac{\partial}{\partial w_j} \left\langle \log \frac{P(y^k | Y^{k-1}, X^k)}{P(y^k | Y^{k-1})} - \gamma \log \frac{P(y^k | Y^{k-1})}{\tilde{P}(y^k | Y^{k-1})} \right\rangle_{Y^k, X^k} \\
&= \left\langle \left[ \frac{\partial \log P(Y^k | X^k)}{\partial w_j} \right] \left( \log \frac{P(y^k | Y^{k-1}, X^k)}{P(y^k | Y^{k-1})} - \gamma \log \frac{P(y^k | Y^{k-1})}{\tilde{P}(y^k | Y^{k-1})} \right) \right\rangle_{Y^k, X^k}
\end{aligned} \tag{8}$$

An identification of the factors  $C, F$ , and  $G$  in the main text is straightforward. From Eq. 4 in the main text we have

$$\log P(y^k | Y^{k-1}, X^k) = y^k \log(\rho^k) + (1-y^k) \log(1-\rho^k) \tag{9}$$

Hence, we can evaluate the factors

$$\begin{aligned}
F^k &= \log \frac{P(y^k | Y^{k-1}, X^k)}{P(y^k | Y^{k-1})} = y^k \log \frac{\rho^k}{\rho^k} + (1-y^k) \log \frac{1-\rho^k}{1-\rho^k} \\
G^k &= \log \frac{P(y^k | Y^{k-1})}{\tilde{P}(y^k | Y^{k-1})} = y^k \log \frac{\bar{\rho}^k}{\bar{\rho}^k} + (1-y^k) \log \frac{1-\bar{\rho}^k}{1-\bar{\rho}^k}
\end{aligned}$$

Furthermore, we can calculate the derivative needed in Eq. 8 using the chain rule from Eq. 6 of the main text, i.e.,

$$P(Y^k | X^k) = \prod_{l=1}^k P(y^l | Y^{l-1}, X^l), \quad [10]$$

which yields

$$\frac{\partial \log P(Y^k | X^k)}{\partial w_j} = \frac{\partial}{\partial w_j} \sum_{l=1}^k \log P(y^l | Y^{l-1}, X^l) \quad [11]$$

$$= \sum_{l=1}^k \left[ \frac{y^l}{\rho^l} - \frac{1-y^l}{1-\rho^l} \right] \rho'^l \sum_n \varepsilon(t^l - t^n) x_j^n \quad [12]$$

We note that in Eq. 8 the factor  $\frac{\partial}{\partial w_j} \log P(Y^k | X^k)$  has to be multiplied with  $F^k$  or with  $G^k$  before taking the average. Multiplication generates terms of the form  $\langle y^l y^k \rangle_{\mathbf{y}^k, \mathbf{x}^k} = \langle \langle y^l y^k \rangle_{\mathbf{y}^k | X^k} \rangle_{\mathbf{x}^k}$ . For any given input  $X^k$ , the autocorrelation  $\langle y^l y^k \rangle_{\mathbf{y}^k | X^k}$  with  $l < k - k_a$  of the postsynaptic neuron will have a trivial value

$$\langle y^l y^k \rangle_{\mathbf{y}^k | X^k} = \langle y^l \rangle_{\mathbf{y}^k | X^k} \langle y^k \rangle_{\mathbf{y}^k | X^k} \quad \text{for } k-l > k_a \quad [13]$$

where  $k_a \Delta t$  is the width of the autocorrelation. As a consequence

$$\left\langle \left[ \frac{y^l}{\rho^l} - \frac{1-y^l}{1-\rho^l} \right] (F^k - \gamma G^k) \right\rangle_{\mathbf{y}^k, \mathbf{x}^k} = 0 \quad \text{for } k-l > k_a \quad [14]$$

Hence, for  $k-l > k_a$ , we can truncate the sum over  $l$  in Eq. 12, i.e.,

$\sum_{l=1}^k \rightarrow \sum_{l=k-k_a}^k$  which yields exactly the coincidence measure  $C_j$  introduced in the main text; cf. Eq. 11 in the main text, and which we repeat here for convenience

$$C_j^k = \sum_{l=k-k_a}^k \left[ \frac{y^l}{\rho^l} - \frac{1-y^l}{1-\rho^l} \right] \rho'^l \sum_n \varepsilon(t^l - t^n) x_j^n \quad [15]$$

### From Averages to an Online Rule

The coincidence measure  $C_j^k$  counts coincidences in a rectangular time window. If we replace the rectangular time window by an exponential one with time constant  $\tau_c$  and go to continuous time, the summation  $\sum_{l=k-k_a}^k \dots$  in Eq. 15 turns into an integral  $\int_{-\infty}^t dt' \exp[-(t-t')/\tau_c] \dots$  which can be transformed into a differential equation

$$\frac{dC_j(t)}{dt} = -\frac{C_j(t-\delta)}{\tau_c} + \sum_f \varepsilon(t-t_j^{(f)}) S(t) [\delta(t-\hat{t}-\delta) - g(u(t))R(t)]; \quad [16]$$

cf. Eq. 15 in the main text. Based on the considerations in the previous paragraph, the time constant  $\tau_c$  should best be chosen in the range

$$k_a \Delta t \leq \tau_c \leq 10 k_a \Delta t .$$

Similarly, the average firing rate  $\bar{\rho}(t) = \bar{g}(t) R(t)$  can be estimated using a running average

$$\tau_{\bar{g}} \frac{d\bar{g}(t)}{dt} = -\bar{g}(t) + g(u(t)) \quad [17]$$

with time constant  $\tau_{\bar{g}}$ .

In Fig. 6, we compare the performance of three different update schemes in numerical simulations. In particular, we show that (i) the exact value of the truncation of the sum in Eq. 15 is not relevant, as long as  $k_a \Delta t$  is larger than the width of the autocorrelation; and (ii) that the online rule is a good approximation to the exact solution.

To do so, we take the scenario from Fig. 3 of the main text. For each segment of 1 s, we simulate 100 pairs of input and output spike trains. We evaluate numerically Eq. 8 by averaging over the 100 samples. After each segment of 1 second (=1,000 time steps) we update the weights using a rule without truncation in the sum of Eq. 15. We call this the full batch update; compare Fig. 6 (Top).

Second, we use the definition of  $C_j^k$  with the truncated sum and repeat the above steps; Fig. 6 (Middle). The truncation is set to  $k_a \Delta t = 200$  ms which is well above the expected width of the autocorrelation function of the postsynaptic neuron. We call this the truncated batch rule.

Third, we use the online rule discussed in the main body of the paper with  $\tau_c = 1$  s; Fig. 6 (Bottom).

Comparison of top and center graphs of Fig. 6 shows that there is no difference in the evolution of mean synaptic efficacies, i.e., the truncation of the sum is allowed, as expected from the theoretical arguments. A further comparison with Fig. 6 Bottom shows that updates based on the online rule add some fluctuations to the results, but its trend captures nicely the evolution of the batch rules.

## Supplement to the Pattern Detection Paradigm

In Fig. 3, we presented a pattern detection paradigm where patterns defined by input rates were chosen randomly and applied for one second. After learning, the spike count over one second is sensitive to the index of the pattern. Fig. 7A shows the histogram of spike counts for each pattern. Optimal classification is achieved by choosing for each spike count the pattern which is most likely.

With this criterion 81 percent of the patterns will be classified correctly.

The update of synaptic efficacies depends on the choice of the parameter  $\gamma$  in the learning rule. According to the optimality criterion in Eq. 8 of the main text, a high level of  $\gamma$  implies a strong homeostatic control of the firing rate of the postsynaptic neuron whereas a low level of  $\gamma$  induces only a weak homeostatic control. In order to study the role of  $\gamma$ , we repeated the numerical experiments for the above pattern detection paradigm with a value of  $\gamma = 100$  instead of our standard value of  $\gamma = 1$ . Fig. 7B shows that the output firing rate is still modulated by the pattern index, the modulation at

$\gamma = 100$  is, however, weaker than that at  $\gamma = 1$ . As a result, pattern detection is less reliably with 45 percent correct classification only. We note that this is still significantly higher than the chance level of 25 percent.
