# Supplementary material
Source: PubMed Central journal article supplement (PMC1074689)

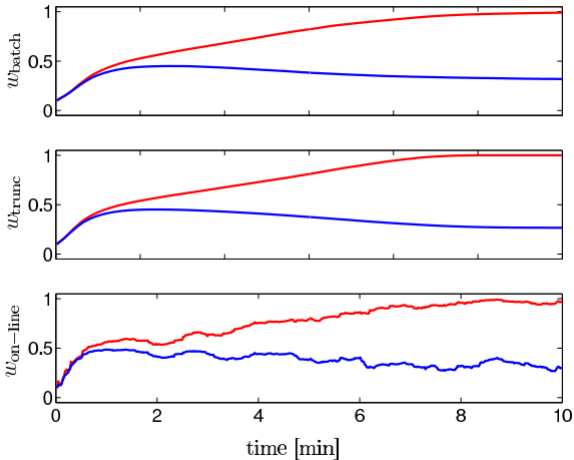

Supplement: pnas_102_14_5239__2.pdf [file pnas_102_14_5239__2.pdf]

**A**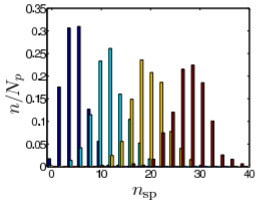**B**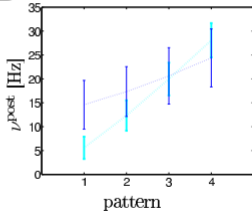

Supplement: pnas_102_14_5239__3.pdf [file pnas_102_14_5239__3.pdf]
